# Supplementary material for: Comparative phylogenomic analysis provides insights into TCP gene functions in Sorghum
Source: PubMed Central journal article supplement (PMC5137041; doi:10.1038/srep38488), 2016-12-05
Supplement: srep38488-s1.pdf [file srep38488-s1.pdf]

## Supplementary Data

**Title: Comparative phylogenomic analysis provides insights into TCP gene functions in**

***Sorghum***

Aleena Francis<sup>1</sup>, Namrata Dhaka<sup>1</sup>, Mohit Bakshi<sup>1</sup>, Ki-Hong Jung<sup>2</sup>, Manoj K. Sharma<sup>3</sup> and Rita Sharma<sup>1,\*</sup>

**Supplementary Table 1.** The percentage similarity among duplicated TCP proteins of *Sorghum*.

| S. No. | Protein 1 | Protein 2 | Percent Identity |
|--------|-----------|-----------|------------------|
| 1      | SbTCP1    | SbTCP3    | 49.51            |
| 2      | SbTCP3    | SbTCP18   | 58.65            |
| 3      | SbTCP5    | SbTCP16   | 65.22            |
| 4      | SbTCP9    | SbTCP19   | 51.81            |
| 5      | SbTCP11   | SbTCP15   | 66.47            |
| 6      | SbTCP12   | SbTCP20   | 70.22            |
| 7      | SbTCP13   | SbTCP15   | 58.59            |

**Supplementary Table 2.** GC content at first, second and third codon positions in TCP genes of *Sorghu*.

| <b>S. No.</b> | <b>Gene Model</b> | <b>% GC in 1<sup>st</sup> codon position</b> | <b>% GC in 2<sup>nd</sup> codon position</b> | <b>% GC in 3<sup>rd</sup> codon position</b> |
|---------------|-------------------|----------------------------------------------|----------------------------------------------|----------------------------------------------|
| 1             | SbTCP1.1          | 0.67                                         | 0.57                                         | 0.87                                         |
| 2             | SbTCP1.2          | 0.67                                         | 0.57                                         | 0.87                                         |
| 3             | SbTCP2            | 0.62                                         | 0.53                                         | 0.77                                         |
| 4             | SbTCP3            | 0.7                                          | 0.57                                         | 0.88                                         |
| 5             | SbTCP4            | 0.71                                         | 0.63                                         | 0.92                                         |
| 6             | SbTCP5            | 0.72                                         | 0.52                                         | 0.78                                         |
| 7             | SbTCP6            | 0.77                                         | 0.58                                         | 0.82                                         |
| 8             | SbTCP7.1          | 0.69                                         | 0.56                                         | 0.86                                         |
| 9             | SbTCP7.2          | 0.69                                         | 0.56                                         | 0.86                                         |
| 10            | SbTCP7.3          | 0.73                                         | 0.55                                         | 0.81                                         |
| 11            | SbTCP8            | 0.69                                         | 0.54                                         | 0.82                                         |
| 12            | SbTCP9            | 0.71                                         | 0.46                                         | 0.88                                         |
| 13            | SbTCP10           | 0.76                                         | 0.52                                         | 0.89                                         |
| 14            | SbTCP11           | 0.73                                         | 0.63                                         | 0.97                                         |
| 15            | SbTCP12           | 0.71                                         | 0.61                                         | 0.81                                         |
| 16            | SbTCP13           | 0.71                                         | 0.66                                         | 0.94                                         |
| 17            | SbTCP14.2         | 0.7                                          | 0.62                                         | 0.86                                         |
| 18            | SbTCP14.3         | 0.7                                          | 0.62                                         | 0.86                                         |
| 19            | SbTCP15           | 0.73                                         | 0.64                                         | 0.96                                         |
| 20            | SbTCP16           | 0.71                                         | 0.56                                         | 0.83                                         |
| 21            | SbTCP17           | 0.74                                         | 0.57                                         | 0.92                                         |
| 22            | SbTCP18           | 0.71                                         | 0.58                                         | 0.85                                         |
| 23            | SbTCP19.1         | 0.69                                         | 0.51                                         | 0.82                                         |
| 24            | SbTCP19.2         | 0.69                                         | 0.51                                         | 0.82                                         |
| 25            | SbTCP19.3         | 0.7                                          | 0.5                                          | 0.84                                         |
| 26            | SbTCP19.4         | 0.7                                          | 0.5                                          | 0.84                                         |
| 27            | SbTCP20           | 0.69                                         | 0.59                                         | 0.8                                          |

**Supplementary Table 3.** Predicted subcellular localization of *Sorghum* TCP proteins (High confidence predictions are highlighted in yellow)

| Gene Name  | Final Prediction    | Plant-mPLoc          | WoLFP SORT           | WoLFP SORT Confidence (No of Nearest Neighbors) | DIST ILL    | DIST ILL confidence | MultiLoc2         | Multi Loc2 Confidence | SubLoc v1.0   | Sub Loc v1.0 Expected accuracy | CELL O v.2.5           | CELL O v.2.5 Reliability |
|------------|---------------------|----------------------|----------------------|-------------------------------------------------|-------------|---------------------|-------------------|-----------------------|---------------|--------------------------------|------------------------|--------------------------|
| SbTC P1.1  | Nuclear             | Nuclear              | Nuclear              | 12                                              | Chloroplast | medium              | Cytoplasmic       | 0.5                   | Nuclear       | 97%                            | Nuclear                | 3.073                    |
| SbTC P1.2  | Nuclear             | Nuclear              | Nuclear              | 12                                              | Chloroplast | medium              | Cytoplasmic       | 0.5                   | Nuclear       | 97%                            | Nuclear                | 3.073                    |
| SbTC P2    | Nuclear             | Nuclear              | Nuclear              | 14                                              | Nuclear     | high                | Cytoplasmic       | 0.43                  | Nuclear       | 100%                           | Nuclear                | 4.589                    |
| SbTC P3    | Nuclear             | Nuclear              | Nuclear              | 14                                              | Chloroplast | medium              | Cytoplasmic       | 0.35                  | Nuclear       | 94%                            | Nuclear                | 3.222                    |
| SbTC P4    | Chloroplast         | Chloroplast, Nuclear | Chloroplast, Cytosol | 7, 7                                            | Chloroplast | high                | mitochondrial     | 0.47                  | Extracellular | 91%                            | Nuclear                | 2.035                    |
| SbTC P5    | Nuclear             | Nuclear              | Nuclear              | 13                                              | Nuclear     | medium              | Cytoplasmic       | 0.56                  | Nuclear       | 91%                            | Nuclear                | 3.307                    |
| SbTC P6    | -                   | Nuclear              | Nuclear              | 7                                               | Chloroplast | medium              | Cytoplasmic       | 0.49                  | Extracellular | 91%                            | Nuclear                | 3.331                    |
| SbTC P7.1  | Nuclear             | Nuclear              | Nuclear              | 14                                              | Nuclear     | high                | Chloroplast       | 0.48                  | Nuclear       | 91%                            | Nuclear                | 4.137                    |
| SbTC P7.2  | Nuclear             | Nuclear              | Nuclear              | 14                                              | Nuclear     | high                | Chloroplast       | 0.48                  | Nuclear       | 91%                            | Nuclear                | 4.137                    |
| SbTC P7.3  | Nuclear             | Nuclear              | Chloroplast          | 10                                              | Chloroplast | medium              | Secretory pathway | 0.4                   | Nuclear       | 95%                            | Nuclear                | 4.299                    |
| SbTC P8    | Nuclear             | Nuclear              | Nuclear              | 12.5                                            | Nuclear     | medium              | Secretory pathway | 0.51                  | Nuclear       | 84%                            | Nuclear                | 4.274                    |
| SbTC P9    | -                   | Nuclear              | Nuclear              | 7                                               | Chloroplast | medium              | Secretory pathway | 0.48                  | Nuclear       | 84%                            | Nuclear                | 3.515                    |
| SbTC P10   | Cytoplasmic         | Nuclear              | Nuclear              | 6                                               | Chloroplast | medium              | Cytoplasmic       | 0.78                  | Nuclear       | 94%                            | Nuclear                | 3.412                    |
| SbTC P11   | -                   | Nuclear              | Nuclear              | 7                                               | Chloroplast | medium              | Chloroplast       | 0.37                  | Mitochondrial | 84%                            | Nuclear                | 2.09                     |
| SbTC P12   | Nuclear             | Nuclear              | Nuclear              | 14                                              | Nuclear     | medium              | Cytoplasmic       | 0.53                  | Nuclear       | 94%                            | Nuclear                | 4.161                    |
| SbTC P13   | -                   | Nuclear              | Nuclear              | 10.5                                            | Chloroplast | medium              | Chloroplast       | 0.45                  | Extracellular | 84%                            | Nuclear                | 2.379                    |
| SbTC P14.2 | Chloroplast         | Nuclear              | Chloroplast          | 9                                               | Chloroplast | medium              | Chloroplast       | 0.71                  | Nuclear       | 74%                            | Nuclear, Chloroplast   | 1.702, 1.352             |
| SbTC P14.3 | -                   | Nuclear              | Chloroplast          | 9                                               | Chloroplast | medium              | Chloroplast       | 0.41                  | Nuclear       | 74%                            | Nuclear, Chloroplast   | 1.702, 1.352             |
| SbTC P15   | Nuclear/chloroplast | Nuclear              | Nuclear              | 7                                               | Chloroplast | low                 | Chloroplast       | 0.81                  | Nuclear       | 100%                           | Nuclear                | 3.46                     |
| SbTC P16   | Nuclear             | Nuclear              | Nuclear              | 9                                               | Nuclear     | high                | Cytoplasmic       | 0.49                  | Mitochondrial | 94%                            | Nuclear                | 1.698                    |
| SbTC P17   | Nuclear             | Nuclear              | Nuclear              | 13                                              | Chloroplast | medium              | Cytoplasmic       | 0.36                  | Extracellular | 91%                            | Nuclear                | 2.905                    |
| SbTC P18   | -                   | Nuclear              | Nuclear              | 11                                              | Nuclear     | medium              | Chloroplast       | 0.41                  | Extracellular | 56%                            | Nuclear                | 2.724                    |
| SbTC P19.1 | -                   | Nuclear              | Nuclear, cytosol     | 5, 5                                            | Chloroplast | medium              | Chloroplast       | 0.38                  | Nuclear       | 94%                            | Nuclear, Mitochondrial | 1.779, 1.340             |
| SbTC P19.2 | -                   | Nuclear              | Nuclear, cytosol     | 5, 5                                            | Chloroplast | medium              | Chloroplast       | 0.38                  | Nuclear       | 94%                            | Nuclear, Mitochondrial | 1.779, 1.340             |

|           |         |                        |                  |      |             |        |             |      |         |     |                        |              |
|-----------|---------|------------------------|------------------|------|-------------|--------|-------------|------|---------|-----|------------------------|--------------|
| SbTCP19.3 | -       | Nuclear                | Nuclear, cytosol | 5, 5 | Chloroplast | low    | Chloroplast | 0.41 | Nuclear | 91% | Nuclear, Mitochondrial | 1.726, 1.388 |
| SbTCP19.4 | -       | Nuclear                | Cytosol          | 5    | Chloroplast | low    | Chloroplast | 0.41 | Nuclear | 91% | Nuclear, Mitochondrial | 1.726, 1.388 |
| SbTCP20   | Nuclear | Cell membrane, Nuclear | Nuclear          | 14   | Nuclear     | medium | Cytoplasmic | 0.54 | Nuclear | 91% | Nuclear                | 4.322        |

**Supplementary Table 4.** Results of Orthology analysis of *Sorghum* proteins with rice and *Arabidopsis*.

| Sorghum Gene | Locus ID       | Rice Gene Name             | % Similarity | E-value | Score |
|--------------|----------------|----------------------------|--------------|---------|-------|
| SbTCP1       | LOC_Os03g57190 | PCF6                       | 60.05        | 1E-108  | 327   |
|              | LOC_Os07g05720 | OsTCP21                    | 45.79        | 2E-70   | 231   |
| SbTCP2       | LOC_Os03g49880 | OsTB1(Lateral Branching 1) | 57.11        | 2E-116  | 348   |
| SbTCP3       | LOC_Os07g05720 | OsTCP21                    | 61.57        | 1E-118  | 358   |
|              | LOC_Os03g57190 | PCF6                       | 46.3         | 8E-69   | 227   |
| SbTCP4       | NA             | NA                         | NA           | NA      | NA    |
| SbTCP5       | LOC_Os09g24480 | OsTCP24                    | 61.86        | 5E-61   | 197   |
|              | LOC_Os08g33530 | OsTCP22                    | 59.84        | 3E-31   | 119   |
| SbTCP6       | LOC_Os08g43160 | PCF2                       | 62.04        | 2E-77   | 245   |
|              | LOC_Os09g34950 | OsTCP25                    | 56.91        | 3E-75   | 239   |
| SbTCP7       | LOC_Os01g11550 | PCF5                       | 76.73        | 2E-178  | 512   |
| SbTCP8       | LOC_Os01g55100 | PCF7                       | 62.89        | 6E-72   | 232   |
|              | LOC_Os01g11550 | PCF5                       | 36.8         | 5E-39   | 148   |
| SbTCP9       | LOC_Os01g55750 | OsTCP5                     | 66.67        | 2E-100  | 300   |
|              | LOC_Os05g43760 | OsTCP18                    | 47.86        | 2E-58   | 192   |
| SbTCP10      | LOC_Os01g69980 | OsTCP6                     | 67.59        | 4E-93   | 282   |
|              | LOC_Os02g51280 | OsTCP9                     | 87.14        | 1E-36   | 138   |
|              | LOC_Os06g12230 | OsTCP19                    | 85.51        | 4E-36   | 136   |
|              | LOC_Os11g07460 | PCF3                       | 74.44        | 9E-35   | 133   |
|              | LOC_Os12g07480 | OsTCP28                    | 66.67        | 7E-34   | 130   |
| SbTCP11      | LOC_Os02g42380 | OsTCP7                     | 68.2         | 5E-69   | 214   |

|         |                |         |       |        |     |
|---------|----------------|---------|-------|--------|-----|
|         | LOC_Os04g44440 | OsTCP17 | 56.64 | 3E-58  | 186 |
| SbTCP12 | LOC_Os02g51280 | OsTCP9  | 86.13 | 8E-162 | 465 |
|         | LOC_Os06g12230 | OsTCP19 | 64.85 | 9E-105 | 318 |
|         | LOC_Os01g69980 | OsTCP6  | 69.7  | 1E-38  | 142 |
| SbTCP13 | LOC_Os04g44440 | OsTCP17 | 45.32 | 3E-36  | 130 |
|         | LOC_Os12g07480 | OsTCP28 | 85.71 | 7E-36  | 133 |
|         | LOC_Os11g07460 | PCF3    | 73.56 | 2E-35  | 132 |
|         | LOC_Os02g42380 | OsTCP7  | 90.48 | 1E-34  | 126 |
| SbTCP14 | LOC_Os04g11830 | PCF1    | 60.64 | 1E-52  | 169 |
|         | LOC_Os11g07460 | PCF3    | 65.38 | 1E-28  | 111 |
| SbTCP15 | LOC_Os04g44440 | OsTCP17 | 67.89 | 1E-75  | 230 |
|         | LOC_Os02g42380 | OsTCP7  | 55.11 | 1E-53  | 174 |
|         | LOC_Os11g07460 | PCF3    | 53.39 | 4E-30  | 116 |
| SbTCP16 | LOC_Os08g33530 | OsTCP22 | 46.64 | 3E-46  | 158 |
|         | LOC_Os09g24480 | OsTCP24 | 88.73 | 5E-35  | 129 |
| SbTCP17 | LOC_Os08g43160 | PCF2    | 75.46 | 2E-156 | 449 |
|         | LOC_Os09g34950 | OsTCP25 | 59.93 | 4E-74  | 238 |
|         | LOC_Os11g07460 | PCF3    | 73.49 | 1E-32  | 127 |
| SbTCP18 | LOC_Os12g42190 | PCF8    | 64.42 | 2E-87  | 267 |
|         | LOC_Os12g02090 | OsTCP27 | 80.46 | 1E-36  | 131 |
|         | LOC_Os07g05720 | OsTCP21 | 57.46 | 1E-31  | 124 |
|         | LOC_Os03g57190 | PCF6    | 73.17 | 7E-31  | 120 |
| SbTCP19 | LOC_Os05g43760 | OsTCP18 | 61.61 | 6E-94  | 284 |
|         | LOC_Os01g55750 | OsTCP5  | 51.37 | 1E-66  | 214 |
| SbTCP20 | LOC_Os02g51280 | OsTCP9  | 68.3  | 1E-124 | 370 |
|         | LOC_Os06g12230 | OsTCP19 | 75.83 | 5E-117 | 350 |
|         | LOC_Os12g07480 | OsTCP28 | 91.03 | 8E-41  | 151 |
|         | LOC_Os11g07460 | PCF3    | 85.37 | 1E-40  | 152 |

|  |                |        |       |       |     |
|--|----------------|--------|-------|-------|-----|
|  | LOC_Os01g69980 | OsTCP6 | 75.58 | 2E-37 | 139 |
|--|----------------|--------|-------|-------|-----|

| Sorghum Gene | Gene ID   | Arabidopsis Gene | % Similarity | E-value | Score |
|--------------|-----------|------------------|--------------|---------|-------|
| SbTCP1       | AT4G18390 | AtTCP2           | 42.12        | 2E-40   | 149   |
|              | AT1G30210 | AtTCP24          | 41.08        | 2E-38   | 142   |
|              | AT3G02150 | AtTCP13          | 65.85        | 4E-28   | 112   |
| SbTCP2       | AT3G18550 | AtTCP18          | 38.05        | 2E-25   | 106   |
| SbTCP3       | AT4G18390 | AtTCP2           | 58.58        | 5E-49   | 174   |
|              | AT1G30210 | AtTCP24          | 50.78        | 2E-42   | 155   |
| SbTCP4       | NA        | NA               | NA           | NA      | NA    |
| SbTCP5       | AT3G18550 | AtTCP18          | 63.1         | 6E-28   | 111   |
| SbTCP6       | AT2G45680 | AtTCP9           | 40.16        | 1E-38   | 142   |
| SbTCP7       | AT3G15030 | AtTCP4           | 41.86        | 9E-75   | 244   |
|              | AT1G53230 | AtTCP3           | 40.19        | 2E-68   | 226   |
|              | AT2G31070 | AtTCP10          | 47.39        | 2E-43   | 159   |
| SbTCP8       | AT3G15030 | AtTCP4           | 40.73        | 2E-39   | 148   |
|              | AT1G53230 | AtTCP3           | 36.8         | 3E-39   | 147   |
|              | AT2G31070 | AtTCP10          | 79.71        | 3E-30   | 120   |
| SbTCP9       | AT5G60970 | AtTCP5           | 81.48        | 2E-39   | 143   |
|              | AT3G02150 | AtTCP13          | 58.33        | 2E-38   | 139   |
|              | AT5G08070 | AtTCP17          | 63.27        | 1E-37   | 136   |
| SbTCP10      | AT3G27010 | AtTCP20          | 50.84        | 5E-53   | 179   |
|              | AT1G58100 | AtTCP8           | 71.28        | 9E-37   | 138   |
|              | AT1G69690 | AtTCP15          | 85.51        | 1E-36   | 136   |
|              | AT2G45680 | AtTCP9           | 76.83        | 6E-36   | 135   |
|              | AT3G47620 | AtTCP14          | 86.76        | 8E-36   | 136   |
| SbTCP11      | AT5G23280 | AtTCP7           | 44.59        | 2E-40   | 141   |
|              | AT5G08330 | AtTCP21          | 42.03        | 1E-35   | 128   |
| SbTCP12      | AT3G47620 | AtTCP14          | 43.47        | 8E-58   | 199   |
|              | AT1G69690 | AtTCP15          | 68.5         | 5E-52   | 179   |
|              | AT1G58100 | AtTCP8           | 85.88        | 6E-45   | 162   |
|              | AT1G72010 | AtTCP22          | 39.81        | 1E-42   | 155   |
| SbTCP13      | AT5G23280 | AtTCP7           | 63.13        | 5E-77   | 236   |
|              | AT1G35560 | AtTCP23          | 77.78        | 3E-37   | 136   |
| SbTCP14      | NA        | NA               | NA           | NA      | NA    |
| SbTCP15      | AT5G23280 | AtTCP7           | 45.81        | 9E-39   | 136   |
|              | AT5G08330 | AtTCP21          | 80.82        | 2E-35   | 127   |
| SbTCP16      | AT3G18550 | AtTCP18          | 49.18        | 5E-28   | 111   |
| SbTCP17      | AT2G45680 | AtTCP9           | 44.54        | 5E-47   | 166   |
|              | AT5G51910 | AtTCP19          | 44.66        | 2E-42   | 152   |
|              | AT1G72010 | AtTCP22          | 71.43        | 1E-34   | 132   |
| SbTCP18      | AT4G18390 | AtTCP2           | 51.85        | 4E-30   | 118   |
| SbTCP19      | AT5G60970 | AtTCP5           | 86.67        | 1E-39   | 144   |
|              | AT3G02150 | AtTCP13          | 52.41        | 1E-39   | 142   |
|              | AT5G08070 | AtTCP17          | 80.26        | 4E-37   | 134   |
| SbTCP20      | AT3G47620 | AtTCP14          | 41.52        | 7E-56   | 193   |
|              | AT1G69690 | AtTCP15          | 67.97        | 3E-49   | 172   |
|              | AT1G58100 | AtTCP8           | 84.71        | 2E-44   | 160   |
|              | AT1G35560 | AtTCP23          | 86.05        | 2E-42   | 154   |
|              | AT1G72010 | AtTCP22          | 85.19        | 3E-41   | 151   |



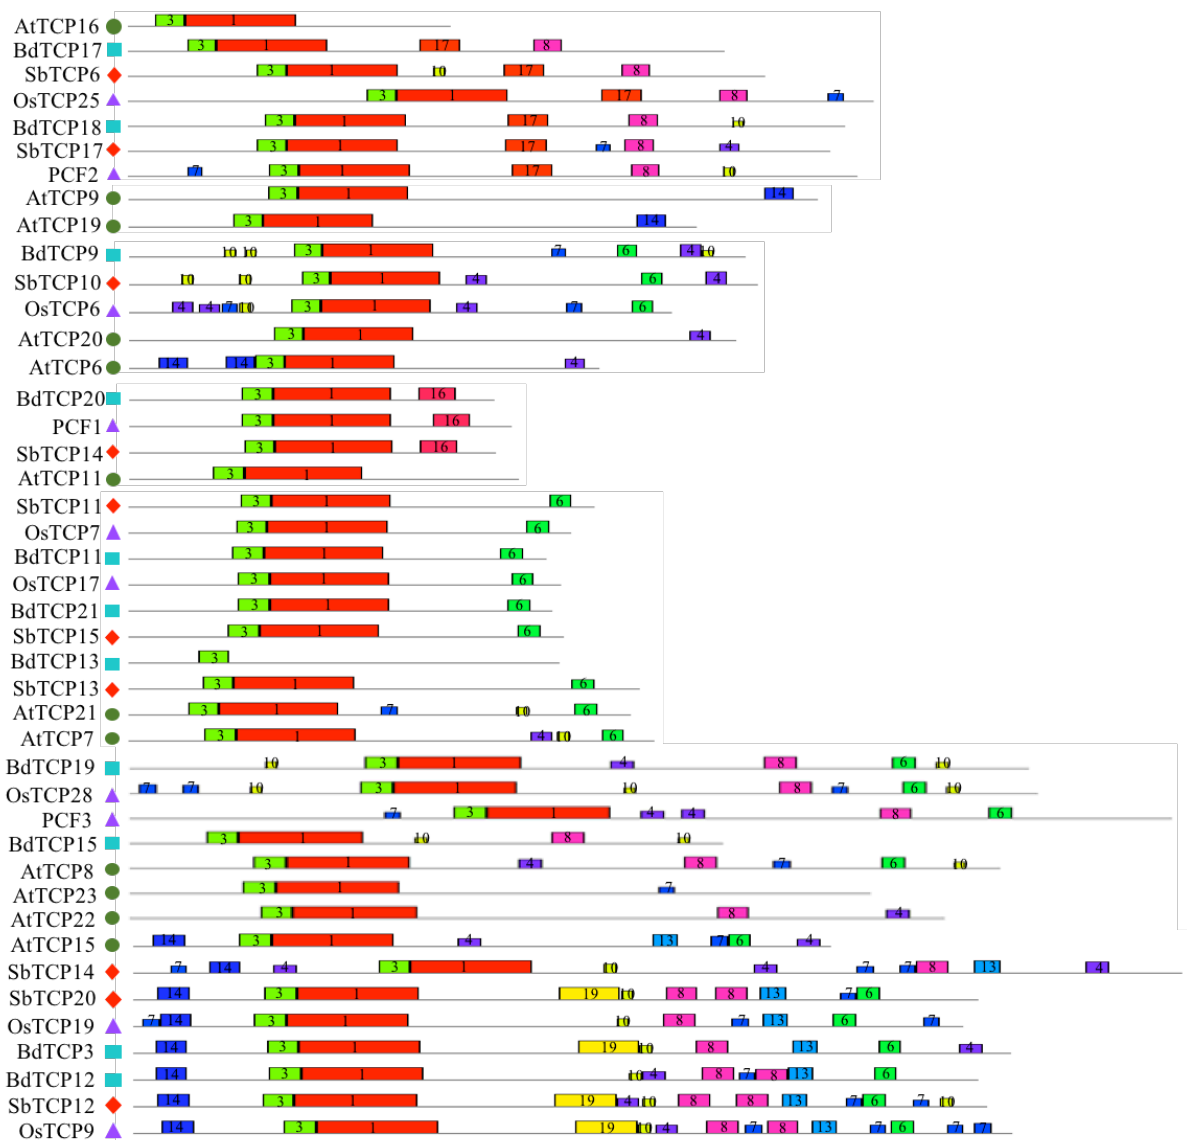



-  Motif 1
-  Motif 2
-  Motif 3
-  Motif 4
-  Motif 5
-  Motif 6
-  Motif 7
-  Motif 8
-  Motif 9
-  Motif 10
-  Motif 11
-  Motif 12
-  Motif 13
-  Motif 14
-  Motif 15
-  Motif 16
-  Motif 17
-  Motif 18
-  Motif 19
-  Motif 20
